# Supplementary material
Source: PubMed Central journal article supplement (PMC2596234)
Supplement: 0808868105_0808868105SI.pdf [file 0808868105_0808868105SI.pdf]

# Supporting Information

Ma *et al.* 10.1073/pnas.0808868105

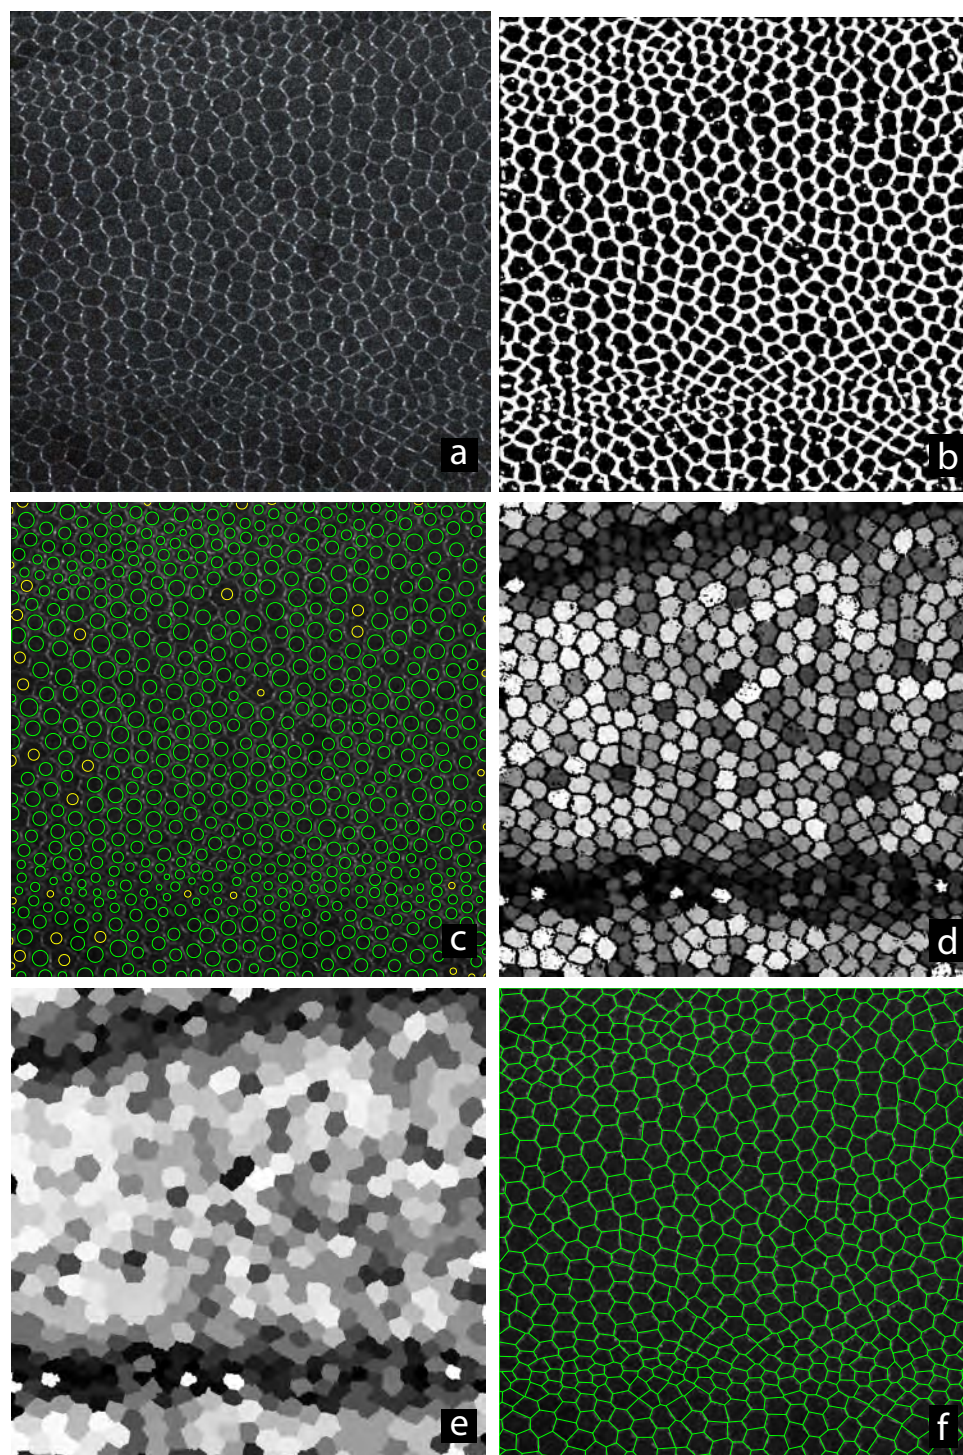

**Fig. S1.** Steps in the cell and edge analysis algorithm. (a) Original image of Dsh distribution 30 h after puparium formation (APF). (b) Separation of image into cell membrane (white) and interior (black) regions. (c) Individual cell detection, by fitting circles in the interior regions. (d) Expanded cell regions to approximate the shape of the detected cells. (e) Expanded cell regions to detect edge locations. (f) Cell edge locations overlaid on the original image.

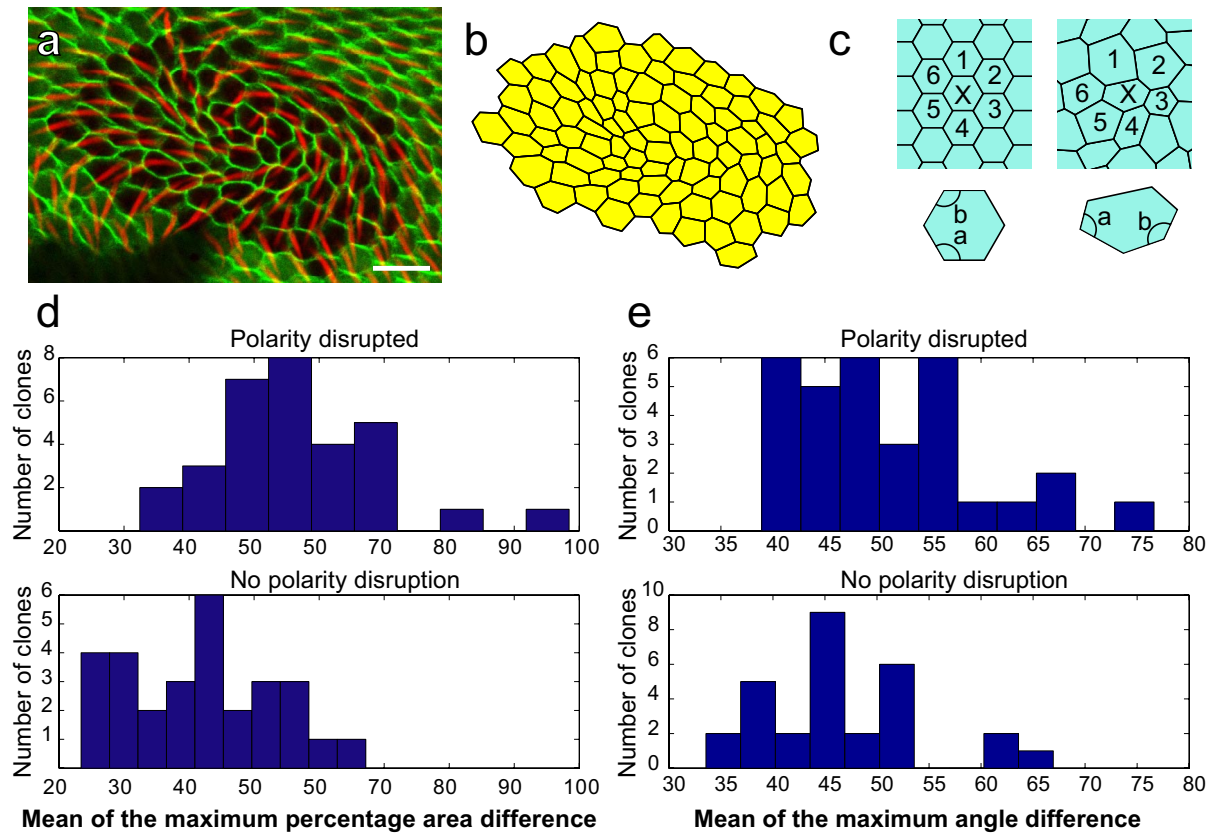

**Fig. S2.** Correlation between cell-shape irregularities and polarity disruption in fat clones. (a) A fat clone with polarity disruption and cell shape irregularities (phalloidin staining in red; cell junction marker ZCL1792 in green). (b) Representation of cell shapes from (a) captured with our image analysis program (Fig. S1). Only the clone cells are shown. (c) Illustrations of measures to quantify regularity of cell geometries: two measures were derived to quantify and compare geometric regularity. Mean of the maximum percentage area difference is given by

$$\frac{1}{N} \sum_{i=1}^N \frac{\max_j |A_i - A_j|}{A_i}$$

where  $N$  is the number of cells in the clone,  $A_i$  is the area of cell  $i$ , and  $j$  is an index over the cells neighboring cell  $i$ . The mean of the maximum angle difference is given by

$$\frac{1}{N} \sum_{i=1}^N \max_k \theta_{i,k} - \min_k \theta_{i,k}$$

where  $\mu_{i,k}$  is the  $k$ th internal angle of cell  $i$ . Differences were determined by using a one-tailed Student's  $t$  test and assumed normal distributions ( $r^2 = 0.05$ ). In a perfect hexagonal array (Top Left), the percent area difference between each cell  $X$  and its neighbors (cells 1–6) is zero; in irregular arrays, this value is greater than zero. Similarly, a perfect hexagonal cell has a maximum internal angle difference of zero (Bottom Left;  $b - a = 0$ ); in irregular cells, the maximum internal angle difference is greater than zero (Bottom Right;  $b - a > 0$ ). Histograms plotting the Mean of the maximum percentage area difference (d) and Mean of the maximum angle difference (e) for 31 fat clones that exhibit polarity disruptions (mean size: 1,105 microns<sup>2</sup>, SD = 545), and for 28 fat clones that show wild-type polarity (mean size: 981 microns<sup>2</sup>, SD = 459).

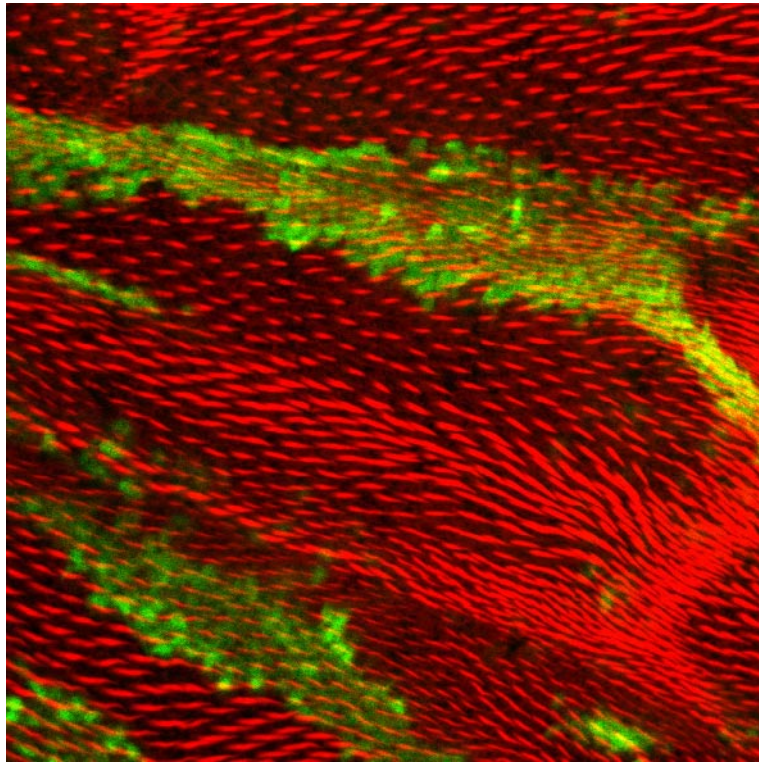

**Fig. S3.** PTEN mutant clones do not disrupt polarity. An image of PTEN mutant clones, marked by absence of GFP, stained at approximately 34-h APF with phalloidin (red) to show the orientation of prehair cells. The polarity is not disrupted in the mutant clones.



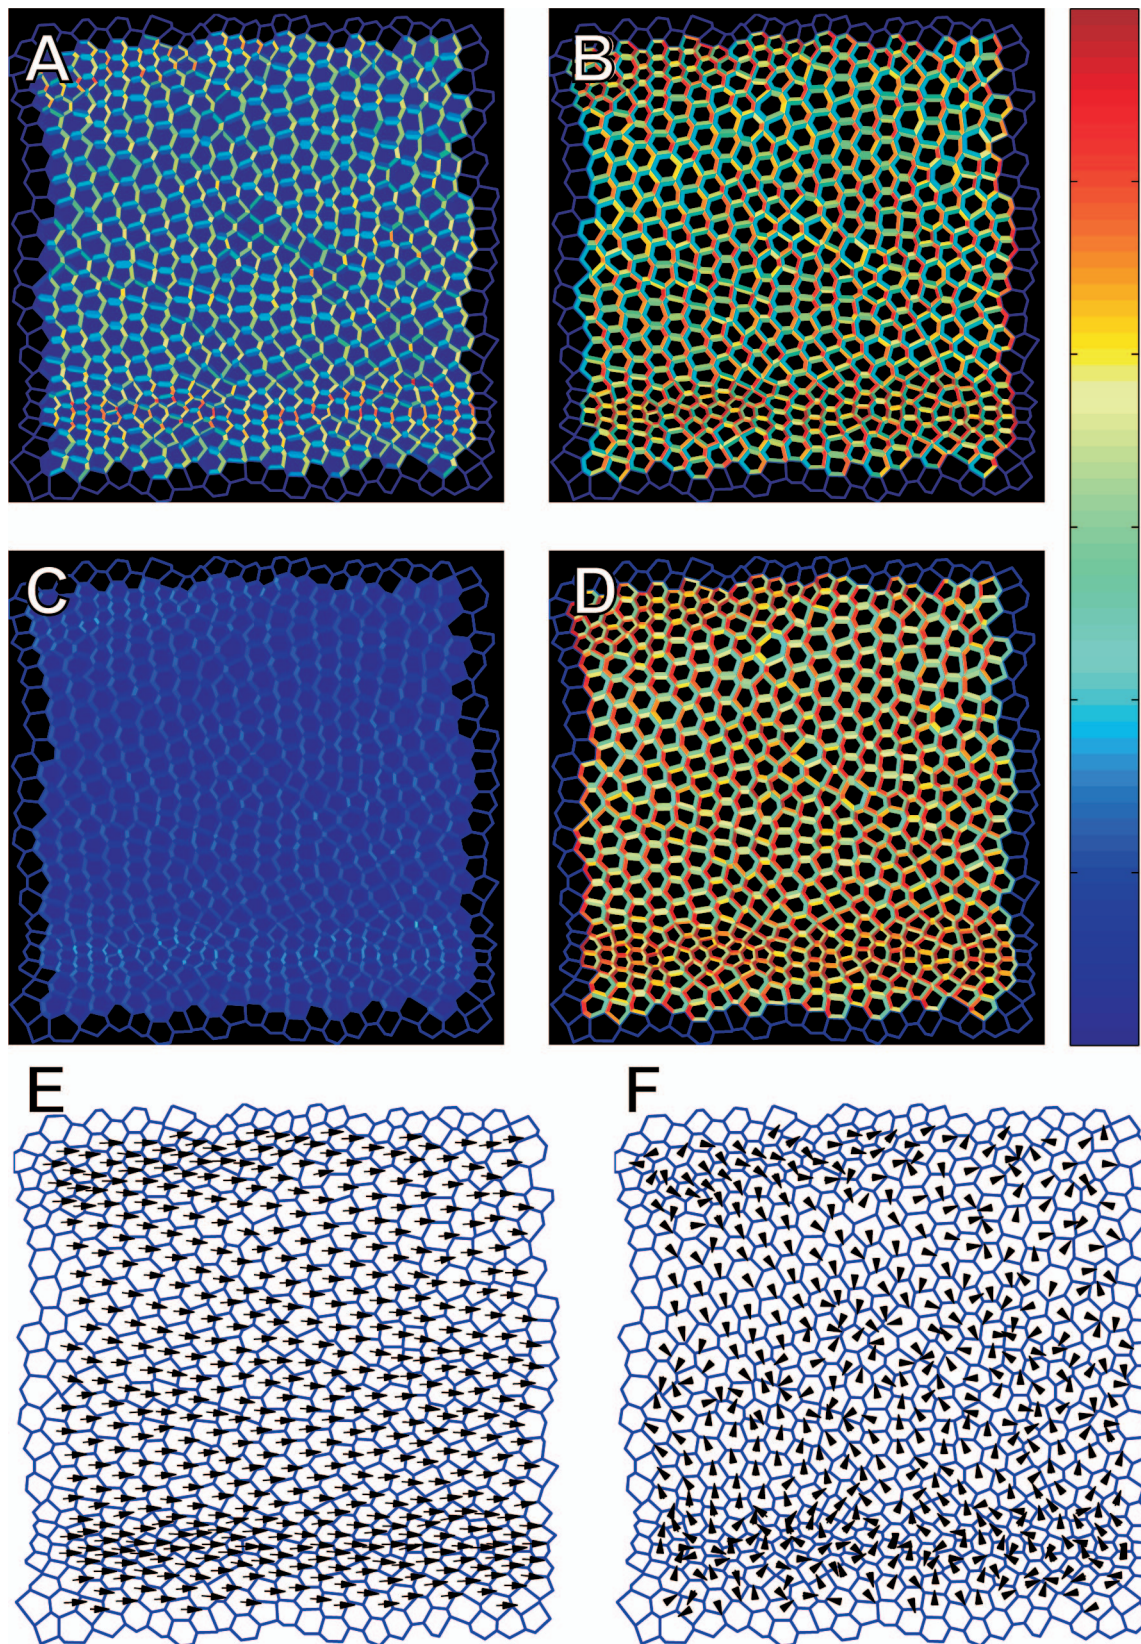

**Fig. S4.** Results from a mathematical model that simulates PCP implemented with real cell geometry. In all panels, the same field of cells is used. Cell geometry is extracted from an image of a 32 h APF wild-type pupal wing. (A–D). Near steady-state protein localization from a simulation of wild-type PCP signaling. Colored bar graph indicates the relative level of protein present at each cell boundary or cell interior: Dsh (A), Fz (B), Pk (C), and Vang (D). (E) Hair polarity derived from Dsh protein localization (A). Vector orientation represents the orientation of the hair, and vector length represents the amount of Dsh asymmetry within the cell. (F) Prediction of polarity in the same wing but in the absence of the global asymmetry input.



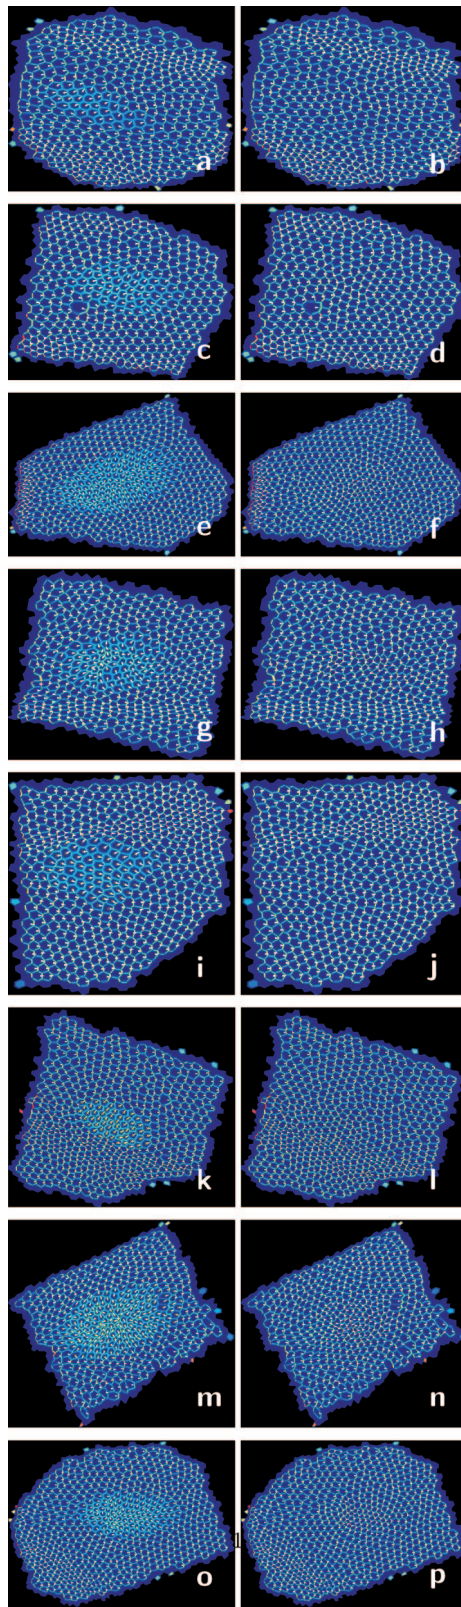

**Fig. S5.** Dsh distributions from simulated *fat* clones and surrounding regions. (a–d) Dsh distributions for simulated cases by using geometries extracted from fat clones showing normal polarity that were used to train the selected parameter set. (a and c) Simulated fat clones. (b and d) Simulated wild-type cells using the same geometry. (e–h) Dsh distributions for simulated cases using geometries extracted from fat clones showing perturbed polarity that were used to train the selected parameter set. (e and g) Simulated fat clones. (f and h) Simulated wild-type cells using the same geometry. (i–l) Dsh distributions for simulated cases using geometries extracted from fat clones showing normal polarity that were not used to train the selected parameter set. (i and k) Simulated fat clones. (j and l) Simulated wild-type cells using the same geometry. (m–p) Dsh distributions for simulated cases using geometries extracted from fat clones showing perturbed polarity that were not used to train the selected parameter set. (m and o) Simulated fat clones. (n and p) Simulated wild-type cells using the same geometry.

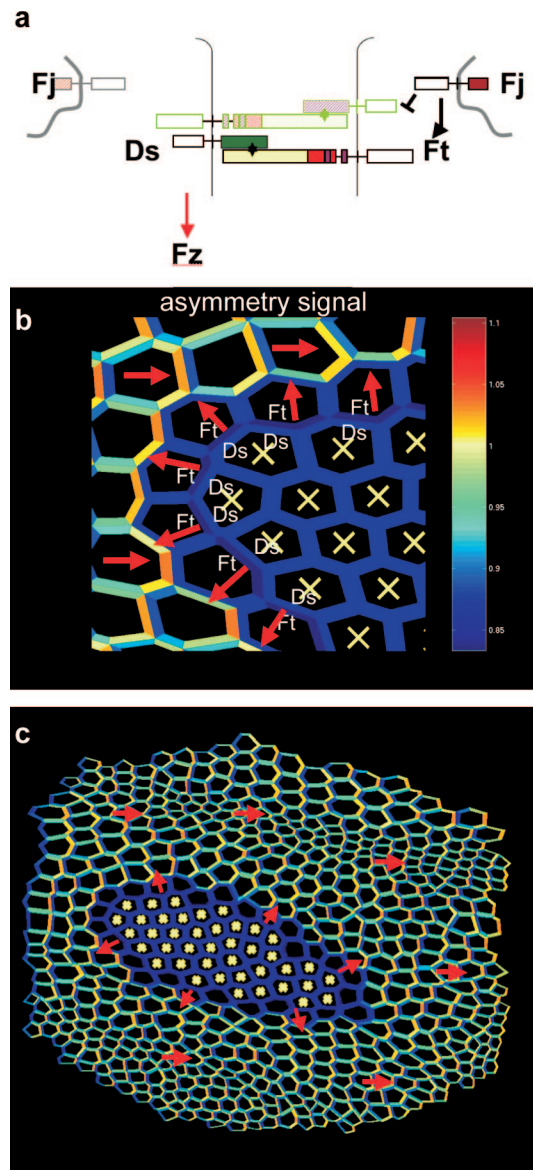

**Fig. S6.** Adjustment of the simulations to represent Ft-Ds nonautonomy near *fat* clone boundaries. (a) Ft-Ds heterodimers orient in 2 possible directions. Tissue gradients of Fj and Ds favor the accumulation of one orientation over the other. (b and c) Ds within *ft* clones accumulates selectively at interfaces with wild-type cells that express Ft. Ft within wild-type cells is therefore drawn to clone boundaries, altering the direction of the global directional signal in wild-type cells surrounding the clone.

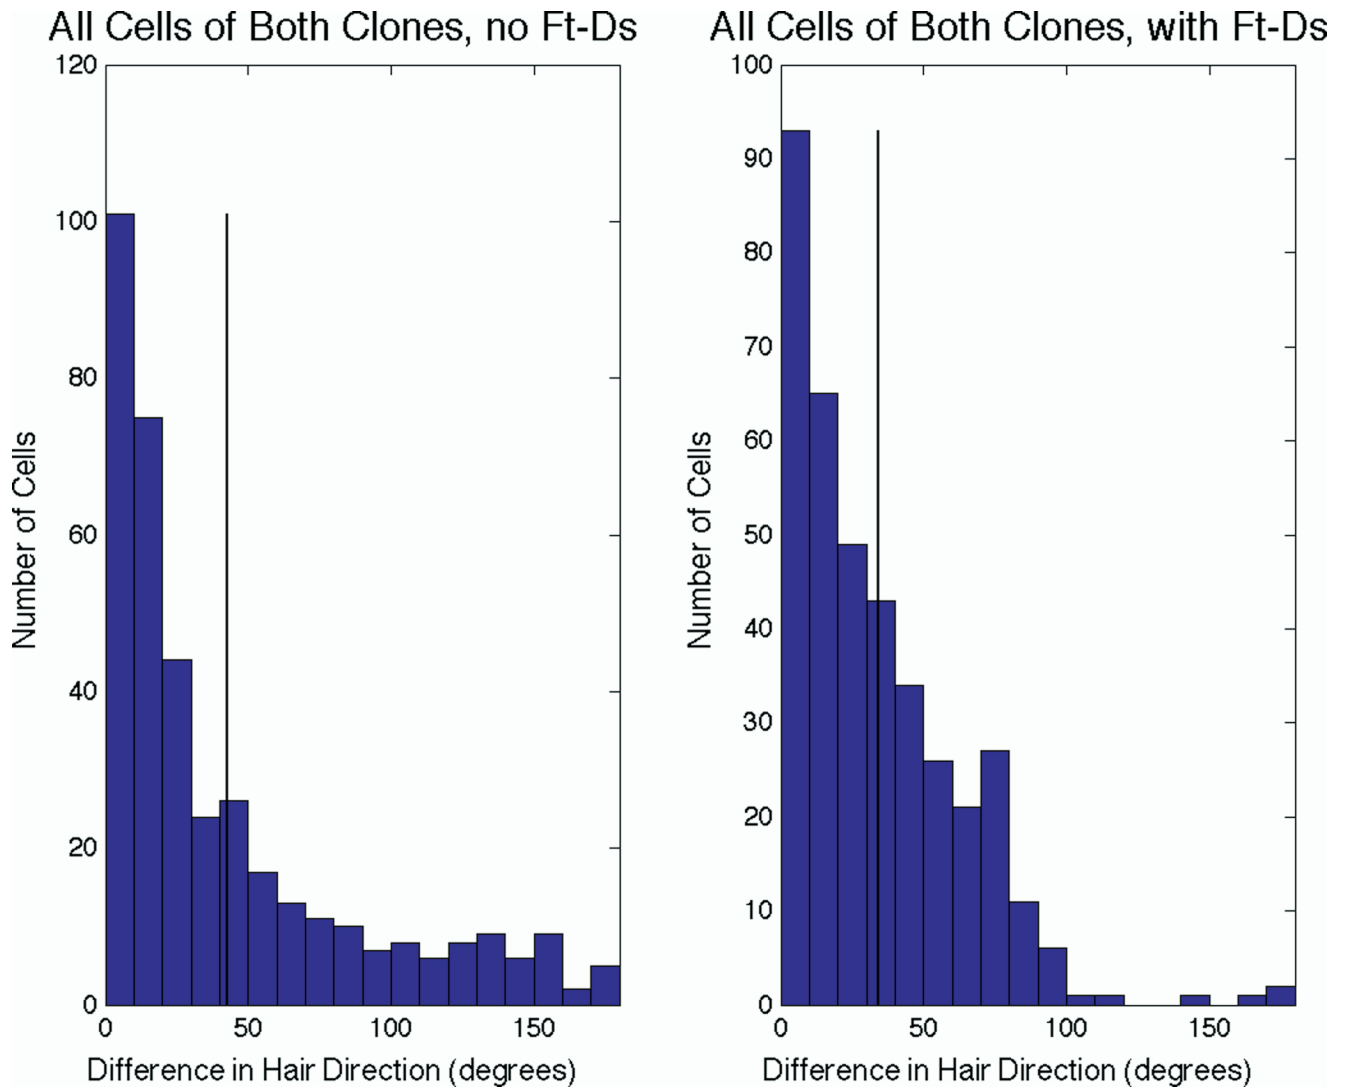

**Fig. S7.** Two histograms depicting the distribution of the normalized difference in hair direction for both clones, in the no Ft-Ds case (*Left*) and in the case with the addition of Ft-Ds (*Right*). The width of the bars in the histograms is  $10^\circ$ . The corresponding global averages are also shown.

**Table S1. Identified parameters for the mathematical model incorporating irregular cell geometry**

| Parameter             | Value                 | Parameter              | Value                 | Parameter              | Value                 |
|-----------------------|-----------------------|------------------------|-----------------------|------------------------|-----------------------|
| [Dsh] <sub>0</sub>    | 1.0                   | <i>R</i> <sub>6</sub>  | $8.34 \times 10^{-1}$ | $\lambda_6$            | $8.90 \times 10^{-7}$ |
| [Pk] <sub>0</sub>     | $3.92 \times 10^{-1}$ | <i>R</i> <sub>7</sub>  | $7.79 \times 10^{-1}$ | $\lambda_7$            | $2.73 \times 10^{-2}$ |
| [Vang] <sub>0</sub>   | 1.66                  | <i>R</i> <sub>8</sub>  | $3.10 \times 10^2$    | $\lambda_8$            | $2.12 \times 10^{-3}$ |
| [Fz] <sub>0</sub>     | 4.82                  | <i>R</i> <sub>9</sub>  | $1.90 \times 10^5$    | $\lambda_9$            | 3.36                  |
| <i>M</i>              | $9.26 \times 10^{-1}$ | <i>R</i> <sub>10</sub> | $2.23 \times 10^3$    | $\lambda_{10}$         | $2.33 \times 10^{-6}$ |
| <i>R</i> <sub>1</sub> | 7.70                  | $\lambda_1$            | $2.13 \times 10$      | <i>K<sub>b</sub></i>   | $1.64 \times 10$      |
| <i>R</i> <sub>2</sub> | $1.36 \times 10$      | $\lambda_2$            | $8.15 \times 10^5$    | <i>K<sub>p</sub></i>   | 2.36                  |
| <i>R</i> <sub>3</sub> | $8.69 \times 10$      | $\lambda_3$            | $5.98 \times 10^{-2}$ | <i>M<sub>IC</sub></i>  | $5.68 \times 10^{-1}$ |
| <i>R</i> <sub>4</sub> | 2.41                  | $\lambda_4$            | $2.77 \times 10^{-3}$ | <i>M<sub>o</sub></i>   | 5.77                  |
| <i>R</i> <sub>5</sub> | $4.78 \times 10^{-6}$ | $\lambda_5$            | $8.82 \times 10^{-8}$ | <i>M<sub>bcl</sub></i> | 1.26                  |

**Other Supporting Information Files**[SI Appendix](#)
